# Supplementary material for: Rapid fabrication of a novel Sn–Ge alloy: structure–property relationship and its enhanced lithium storage properties
Source: Royal Society of Chemistry journal article supplement (doi:10.1039/c3ta13315j), 2013-01-01
Supplement: c3ta13315j.pdf [file c3ta13315j.pdf]

## Supporting Information

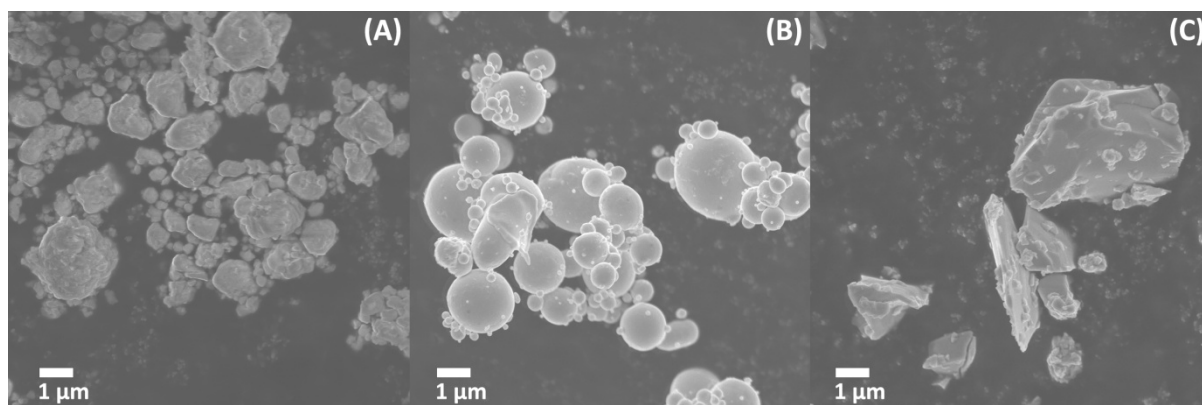

**Fig. S1** Micrographs showing the particle size of (a) Sn-Ge (MS), (b) pure Sn and (c) pure Ge precursors.

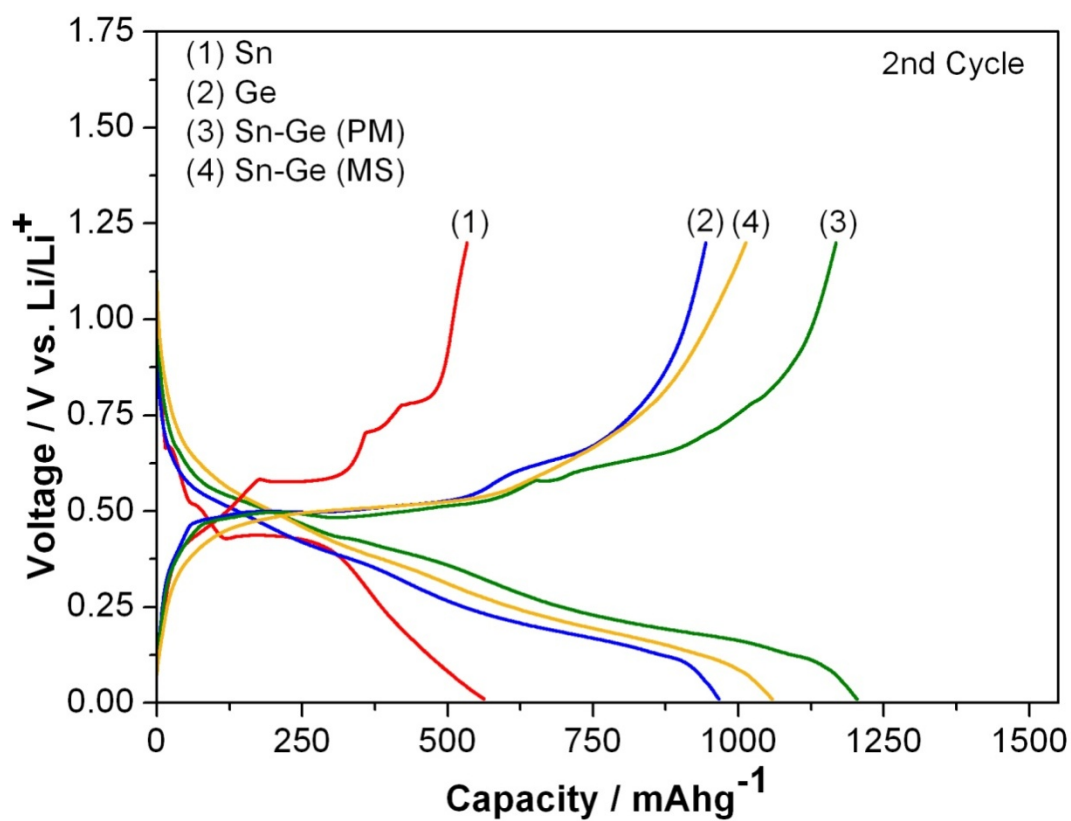

**Fig. S2** 2<sup>nd</sup> charge/discharge voltage profiles of Sn-Ge(MS), Sn-Ge (PM), pure Sn and Ge at C/10.

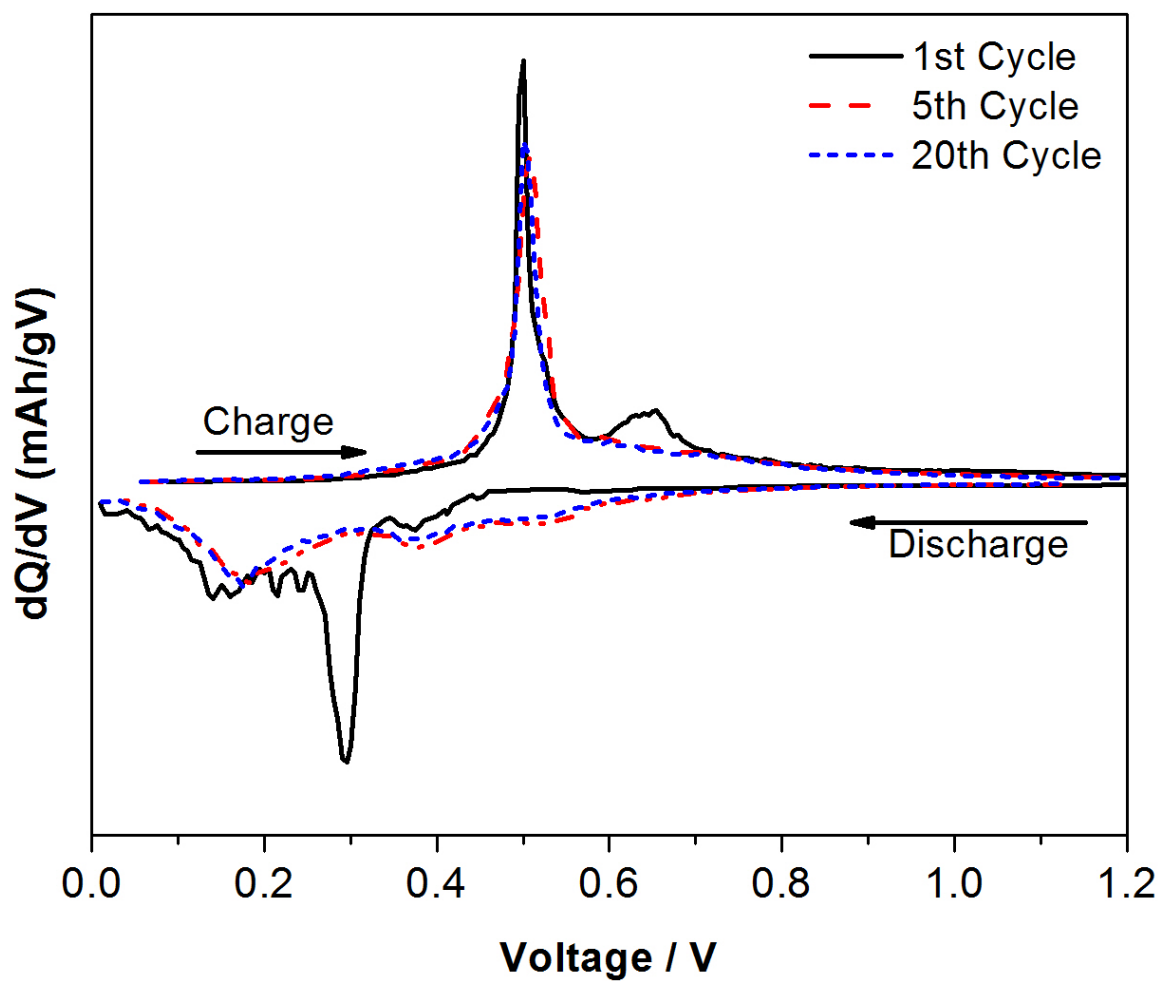

Fig. S3 Differential capacity plots of Sn-Ge (MS) at 1st, 5th and 20th cycle.

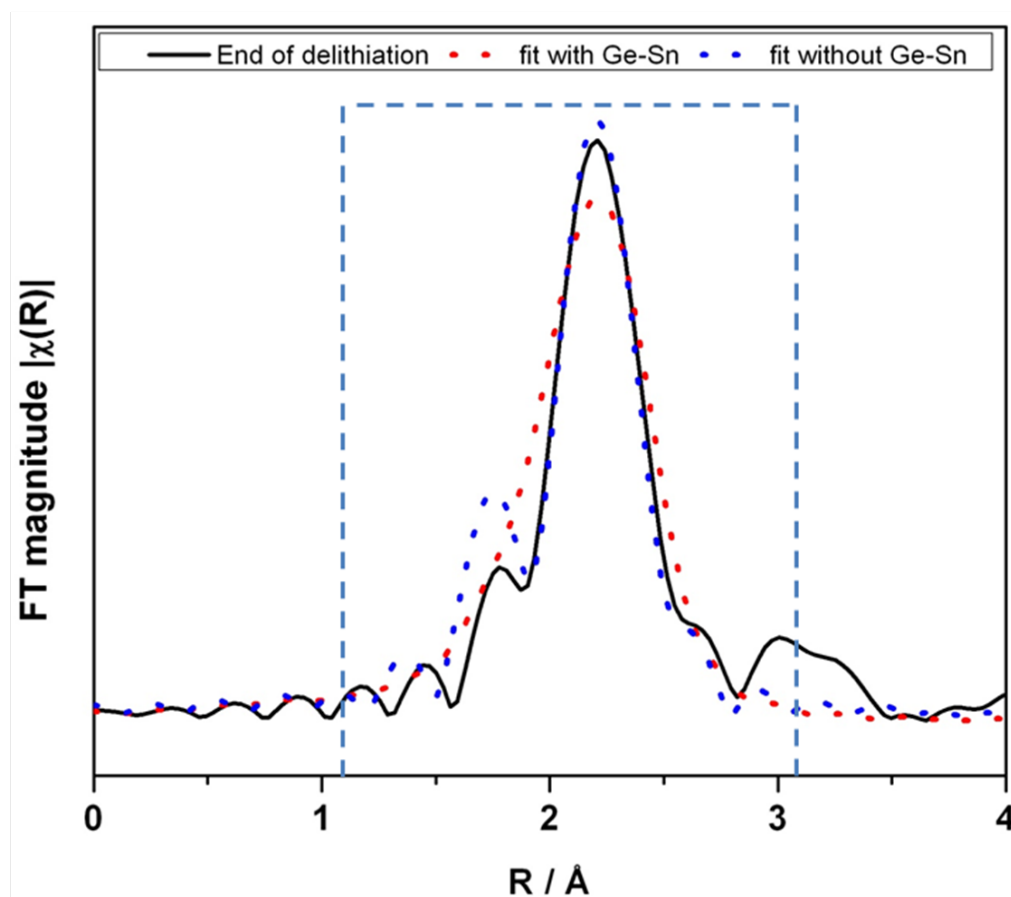

**Figure S4.** Fourier transforms of  $k^2$ -weighted EXAFS spectra for delithiated Sn-Ge for the two fits. The fitting that includes both Ge-Sn and Ge-Ge bonds are represented by the red dots, and blue dots for the fitting with only Ge-Ge bonds. The dotted lines indicate the window used for the fit.

**Table S1** Summary of single-scattering paths used in the fit, and local structure parameters based on quantitative analysis of Fourier transforms of  $k^2$ -weighted EXAFS spectra for delithiated Sn-Ge (MS) using the alloy model and Ge model. Uncertainties in the last digit(s) are given in parentheses. The percentage of Ge from the alloy model is refined to be 103% +/- 4%. Notice that the  $\sigma^2$  for alloy model is negative, indicating that the alloy model is not suitable for delithiated Sn-Ge (MS).

|             |       | N       | R (Å)      | $\sigma^2$ ( $10^{-3}$ Å <sup>2</sup> ) | Reduced $\chi^2 \times 10^3$ | R factor $\times 10^{-2}$ |
|-------------|-------|---------|------------|-----------------------------------------|------------------------------|---------------------------|
| Alloy model | Ge-Ge | 3       | 2.486 (30) | 12.5 (30)                               | 1.641                        | 4.18                      |
|             | Ge-Sn | 1       | 2.457 (16) | -2.2 (38)                               |                              |                           |
| Ge model    | Ge-Ge | 2.2 (4) | 2.481 (11) | 5.3 (14)                                | 1.106                        | 3.61                      |

**Table S2.** Summary of single-scattering paths used in the fit, and local structure parameters based on quantitative analysis of Fourier transforms of  $k^2$ -weighted EXAFS spectra for delithiated Sn-Ge (MS) for the two cases where there's only Ge-Ge bond, and where there's both Ge-Ge and Ge-Li bond. The negative  $\sigma^2$  is an indication of the likely absence of Ge-Li bond. Uncertainties in the last digit(s) are given in parentheses.

| Data                       |       | N          | R (Å)      | $\sigma^2$ ( $10^{-3}$ Å <sup>2</sup> ) | Reduced $\chi^2 \times 10^3$ | R factor $\times 10^{-2}$ |
|----------------------------|-------|------------|------------|-----------------------------------------|------------------------------|---------------------------|
| <b>1.20 V</b><br>(charged) | Ge-Ge | 2.2 (4)    | 2.481 (11) | 5.3 (14)                                | 1.106                        | 3.61                      |
|                            | Ge-Ge | 2.0 (8)    | 2.469 (20) | 1.2 (20)                                | 1.772                        | 4.82                      |
|                            | Ge-Li | 0.14 (150) | 2.719 (60) | -3.26 (50)                              |                              |                           |
